# Supplementary material for: Epistasis-driven identification of SLC25A51 as a regulator of human mitochondrial NAD import
Source: PubMed Central journal article supplement (PMC7708531; doi:10.1038/s41467-020-19871-x), 2020-12-01
Supplement: 41467_2020_19871_MOESM1_ESM.pdf [file 41467_2020_19871_MOESM1_ESM.pdf]

# Suppl Figure 1

a

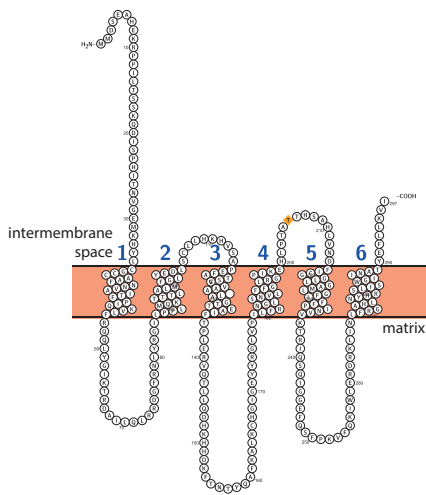

b

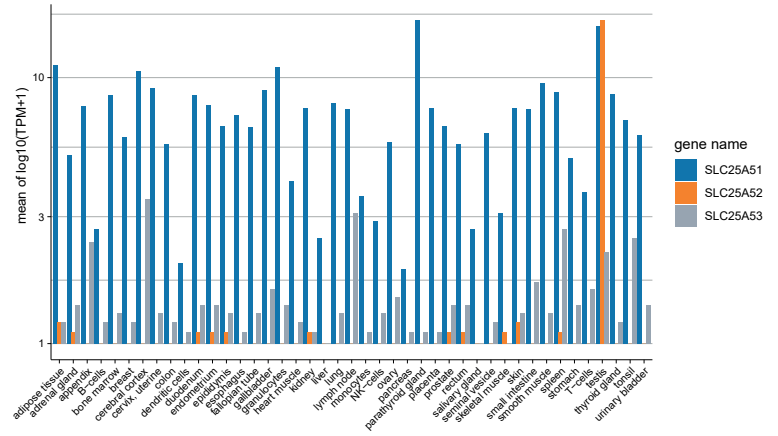

**Suppl Fig 1. a.** Predicted topology of SLC25A51. Figure generated using Protter<sup>1</sup>. **b.** Expression of SLC25A51/52/53 in healthy tissues according to Uhlen et al<sup>2</sup>. Mean expression is shown (n=1).

## References:

1. Omasits, U., Ahrens, C. H., Müller, S. & Wollscheid, B. Protter: interactive protein feature visualization and integration with experimental proteomic data. *Bioinformatics* 30, 884–886 (2014).
2. Uhlen, M. et al. Tissue-based map of the human proteome. *Science* 347, (2015).

# Suppl Figure 2

a

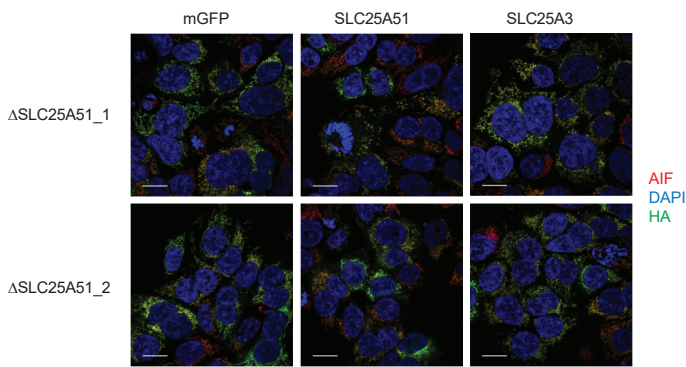

b

| Gene    | Protein                                                       | Cofactor(s)       |
|---------|---------------------------------------------------------------|-------------------|
| CS      | citrate synthase                                              |                   |
| COX20   | Subunit of complex IV                                         |                   |
| PDHA1   | pyruvate dehydrogenase                                        | thiamine/NAD/ CoA |
| PDHB    | pyruvate dehydrogenase                                        | thiamine/NAD/ CoA |
| MDH2    | malate dehydrogenase                                          | NAD               |
| GRHPR   | hydroxypyruvatereductase                                      | NAD               |
| DLAT    | pyruvate dehydrogenase                                        | thiamine/NAD/ CoA |
| SLC24A2 | Ca <sup>2+</sup> /K <sup>+</sup> /Na <sup>+</sup> transporter |                   |
| GTPBP3  | mitochondrial tRNA modification                               | THF               |
| ATP1B4  | Na <sup>+</sup> /K <sup>+</sup> ATPase                        |                   |

c

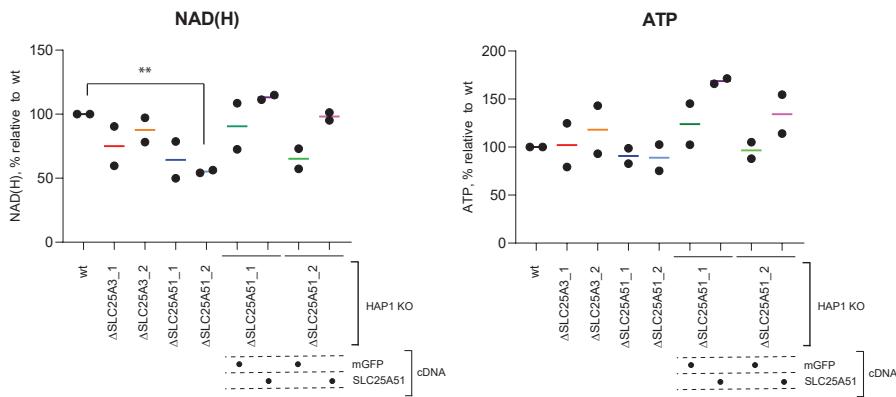

d

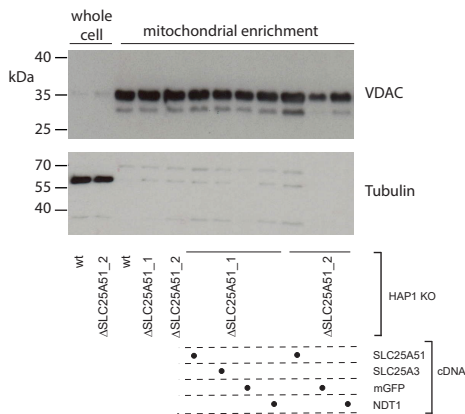

e

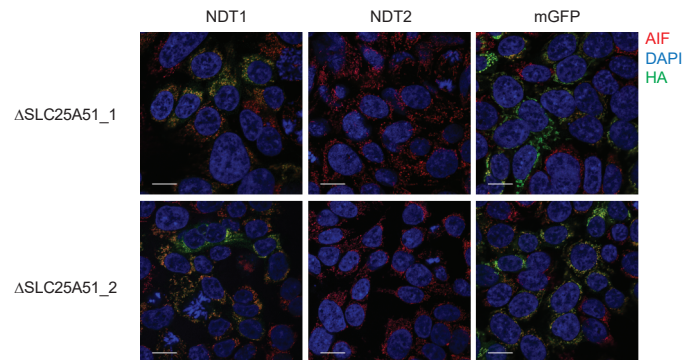

**Suppl Fig 2. a.** Representative confocal images (out of two independent experiments) of HAP1 cells lacking endogenous SLC25A51 and reconstituted with mitoGFP, SLC25A3 or SLC25A51 cDNA. Green: ectopic HA-tagged protein, Blue: DAPI, Red: Apoptosis inducing factor (AIF). Scale bar: 20  $\mu$ m. **b.** List of the top correlated genes specific to SLC25A51 but not SLC25A3, according to the co-essentiality analysis. **c.** Total cellular levels of NAD/NADH (lefthand panel) and ATP (righthand panel) in the indicated cell lines, normalized to wt levels. Cumulative results of two biological replicates, each performed in technical triplicates. Statistical significance was calculated with a one-way ANOVA with Dunnett's multiple comparison test. \*\*: pvalue < 0.05. Only statistically significant comparisons are labeled. **d.** Western blot of whole lysate and mitochondria-enriched fractions for the genotype listed, showing differential accumulation of the mitochondrial protein VDAC (Voltage-dependent anion channel) and the cytosolic protein alpha-tubulin. Images from two different membranes derived from one biological replicate experiment. **e.** Representative confocal images (out of two independent experiments) of HAP1 cells lacking endogenous SLC25A51 and reconstituted with HA-tagged mitoGFP, NDT1 or NDT2 cDNA. Green: ectopic HA-tagged protein, Blue: DAPI, Red: AIF. Scale bar: 20  $\mu$ m.
